# Supplementary material for: The Volcanoes of Naples: how effectively mitigating the highest volcanic risk in the World?
Source: Copernicus journal article supplement (doi:10.5194/nhess-2020-51), 2020-03-27
Supplement: Supplementary file [file nhess-2020-51-AC5-supplement.pdf]

Answers to the Reviewer 3 (Listed as RC2: Marco Sacchi)

We thank the reviewer for his helpful suggestions; we are going here to answer point by point:

**The review of the volcanological framework of the Neapolitan district is concise but informative and it may eventually benefit from (even very short) additional mention/discussion on Roccamonfina, as the NW boundary of the Campania volcanic area, as well as on the volcanic edifices and subvolcanic structures offshore the Napoli Bay, as the S border of the volcanic district, (see detailed reference list below). The mentioning of the (significantly vast) submerged volcanic features of the Napoli Bay may also serve to highlight the importance the volcanic hazard associated with the (relatively less known) submarine volcanic features for a more comprehensive and reliable hazard estimate and mapping.**

Answer: *We agree with this suggestion, so we included, in the overview of the Campanian Volcanic zone, more details about Roccamonfina and the submerged volcanic features of the Naples Bay. Thank you, it was a very good point.*

**line 144-145: Consider the possibility of adding (a selection of) the following references: “The main volcanic hazards are pyroclastic flows and ash/pumice fallout (e.g. Sacchi et al., 2005; 2019; 2020), but also associated hazards like earthquakes, lahars, lava flows and floods (Sacchi et al., 2009), need to be considered”;**

Answer: *we agree, and have included the related references. Thank you.*

**line 177: Cassano and La Torre, 1987 instead of “Cassano et al., 1987”**

**line 177: Capuano and Achauer, 2003 instead of “Capuano et al., 2003”;**

Answer: *thank you for having pointed out this small mistakes with indicated references.*

**line 177-178: Consider the possibility of adding (a selection of) the following references: “has a radius of about 3 km, with center approximately located at the Pozzuoli town harbour” (Sacchi et al., 2014; Somma et al., 2015; Steinmann et al, 2016; 2018 Sacchi et al, 2019; 2020);**

Answer: *ok, thank you. We added some of the quoted references in the revised version.*

**Line 192: Consider the possibility of adding the following reference: “(the so-called ‘mini-uplift’ episodes: see Gaeta et al., 2003; Troise et al., 2007;” Iuliano et al., 2015);**

Answer: *ok, thank you. We added the suggested reference.*

**Line 228-229: Consider the possibility of adding the following reference: Ischia island, located South-West of Campi Flegrei, is another volcanic field, characterized by both effusive and explosive eruptions (Passaro et al., 2015);**

Answer: *Ok, we added the suggested reference.*

We hope to have now satisfied all the reviewer concerns.

Best Regards

Giuseppe De Natale, Claudia Troise, Renato Somma
